# Supplementary material for: Comparative microRNA profiling of Trypanosoma cruzi infected human cells
Source: Front Cell Infect Microbiol. 2023 Jun 21;13:1187375. doi: 10.3389/fcimb.2023.1187375 (PMC10322668; doi:10.3389/fcimb.2023.1187375)
Supplement: Supplementary file 10 [file Table_9.xlsx]

## Sheet: miEAA-miRNA-Enrichment_10-UP_ca
Table S9. Results from functional analysis of the ten miRNAs with significant deregulation in cardiomyocytes (0 and 3 hpi). The table includes results from enrichment analysis of the upregulated miRNAs (MiEAA); node descriptions from a network built up from the ten miRNAs (using miRnet) as well as the ORA results for Reactome term enrichment of the 39 genes included by miRnet in the network.
Enrichment analysis of the ten upregulated miRNAs in infected cardiomyocytes performed using miEAA. For each category, only terms with FDR-adjusted p<0.05 are discussed in the main text.
Category	Subcategory	Enrichment	P-value	P-adjusted	Q-value	Expected	Observed	miRNAs/precursors
Annotations derived over miRTarBase (Gene Ontology)	I-SMAD binding GO0070411	over-represented	1.21e-06	0.0027213	0.0027213	1.17486	8	hsa-miR-30a-5p; hsa-miR-148a-3p; hsa-miR-381-3p; hsa-miR-182-5p; hsa-miR-200b-3p; hsa-miR-183-5p; hsa-miR-200a-3p; hsa-miR-134-5p
Annotations derived over miRTarBase (Gene Ontology)	SMAD protein complex assembly GO0007183	over-represented	4.58e-07	0.0027213	0.0027213	1.03825	8	hsa-miR-30a-5p; hsa-miR-148a-3p; hsa-miR-381-3p; hsa-miR-182-5p; hsa-miR-200b-3p; hsa-miR-183-5p; hsa-miR-363-3p; hsa-miR-200a-3p
Annotations derived over miRTarBase (Gene Ontology)	pulmonary valve morphogenesis GO0003184	over-represented	1.06e-06	0.0027213	0.0027213	1.15535	8	hsa-miR-30a-5p; hsa-miR-148a-3p; hsa-miR-182-5p; hsa-miR-200b-3p; hsa-miR-183-5p; hsa-miR-363-3p; hsa-miR-200a-3p; hsa-miR-134-5p
Annotations derived over miRTarBase (Gene Ontology)	negative regulation of vascular smooth muscle cell differentiation involved in phenotypic switching GO1905931	over-represented	1.9e-06	0.0032028	0.0032029	0.249805	5	hsa-miR-30a-5p; hsa-miR-148a-3p; hsa-miR-182-5p; hsa-miR-200b-3p; hsa-miR-200a-3p
Annotations derived over miRTarBase (Gene Ontology)	R-SMAD binding GO0070412	over-represented	2.73e-06	0.003672	0.003672	1.91647	9	hsa-miR-30a-5p; hsa-miR-148a-3p; hsa-miR-381-3p; hsa-miR-182-5p; hsa-miR-200b-3p; hsa-miR-183-5p; hsa-miR-363-3p; hsa-miR-200a-3p; hsa-miR-134-5p
Annotations derived over miRTarBase (Gene Ontology)	cell migration involved in endocardial cushion formation GO0003273	over-represented	4.83e-06	0.0046413	0.0046413	0.300546	5	hsa-miR-30a-5p; hsa-miR-182-5p; hsa-miR-200b-3p; hsa-miR-183-5p; hsa-miR-363-3p
Annotations derived over miRTarBase (Gene Ontology)	negative regulation of anoikis GO2000811	over-represented	4.51e-06	0.0046413	0.0046413	1.38954	8	hsa-miR-30a-5p; hsa-miR-148a-3p; hsa-miR-182-5p; hsa-miR-200b-3p; hsa-miR-183-5p; hsa-miR-363-3p; hsa-miR-200a-3p; hsa-miR-134-5p
Annotations derived over miRTarBase (Gene Ontology)	DNA methylation on cytosine within a CG sequence GO0010424	over-represented	8.12e-06	0.0050541	0.0050542	0.148322	4	hsa-miR-30a-5p; hsa-miR-148a-3p; hsa-miR-200b-3p; hsa-miR-200a-3p
Annotations derived over miRTarBase (Gene Ontology)	endocardial cell differentiation GO0060956	over-represented	7.37e-06	0.0050541	0.0050542	0.601093	6	hsa-miR-30a-5p; hsa-miR-182-5p; hsa-miR-200b-3p; hsa-miR-183-5p; hsa-miR-363-3p; hsa-miR-134-5p
Annotations derived over miRTarBase (Gene Ontology)	primary miRNA processing GO0031053	over-represented	8.26e-06	0.0050541	0.0050542	0.995316	7	hsa-miR-30a-5p; hsa-miR-1246; hsa-miR-148a-3p; hsa-miR-381-3p; hsa-miR-200b-3p; hsa-miR-183-5p; hsa-miR-200a-3p
Annotations derived over miRTarBase (Gene Ontology)	secondary palate development GO0062009	over-represented	6.91e-06	0.0050541	0.0050542	1.4676	8	hsa-miR-30a-5p; hsa-miR-1246; hsa-miR-148a-3p; hsa-miR-381-3p; hsa-miR-182-5p; hsa-miR-200b-3p; hsa-miR-183-5p; hsa-miR-200a-3p
Annotations derived over miRTarBase (Gene Ontology)	SMAD protein complex GO0071141	over-represented	9.93e-06	0.0055719	0.0055719	1.53786	8	hsa-miR-30a-5p; hsa-miR-148a-3p; hsa-miR-381-3p; hsa-miR-182-5p; hsa-miR-200b-3p; hsa-miR-183-5p; hsa-miR-363-3p; hsa-miR-200a-3p
Annotations derived over miRTarBase (Gene Ontology)	B cell activation GO0042113	over-represented	1.28e-05	0.0056055	0.0056055	1.5886	8	hsa-miR-30a-5p; hsa-miR-148a-3p; hsa-miR-381-3p; hsa-miR-182-5p; hsa-miR-200b-3p; hsa-miR-363-3p; hsa-miR-200a-3p; hsa-miR-134-5p
Annotations derived over miRTarBase (Gene Ontology)	activin responsive factor complex GO0032444	over-represented	1.46e-05	0.0056055	0.0056055	0.675254	6	hsa-miR-148a-3p; hsa-miR-381-3p; hsa-miR-182-5p; hsa-miR-200b-3p; hsa-miR-183-5p; hsa-miR-200a-3p
Annotations derived over miRTarBase (Gene Ontology)	chromo shadow domain binding GO0070087	over-represented	1.67e-05	0.0056055	0.0056055	0.690867	6	hsa-miR-30a-5p; hsa-miR-148a-3p; hsa-miR-381-3p; hsa-miR-182-5p; hsa-miR-183-5p; hsa-miR-200a-3p
Annotations derived over miRTarBase (Gene Ontology)	histone serine kinase activity GO0035174	over-represented	1.51e-05	0.0056055	0.0056055	0.679157	6	hsa-miR-30a-5p; hsa-miR-148a-3p; hsa-miR-182-5p; hsa-miR-183-5p; hsa-miR-363-3p; hsa-miR-200a-3p
Annotations derived over miRTarBase (Gene Ontology)	negative regulation of cell aging GO0090344	over-represented	1.11e-05	0.0056055	0.0056055	0.160031	4	hsa-miR-30a-5p; hsa-miR-148a-3p; hsa-miR-200b-3p; hsa-miR-134-5p
Annotations derived over miRTarBase (Gene Ontology)	negative regulation of fat cell differentiation GO0045599	over-represented	1.49e-05	0.0056055	0.0056055	2.3224	9	hsa-miR-30a-5p; hsa-miR-1246; hsa-miR-148a-3p; hsa-miR-381-3p; hsa-miR-182-5p; hsa-miR-200b-3p; hsa-miR-183-5p; hsa-miR-363-3p; hsa-miR-200a-3p
Annotations derived over miRTarBase (Gene Ontology)	positive regulation of inflammatory response GO0050729	over-represented	1.17e-05	0.0056055	0.0056055	2.25995	9	hsa-miR-30a-5p; hsa-miR-148a-3p; hsa-miR-381-3p; hsa-miR-182-5p; hsa-miR-200b-3p; hsa-miR-183-5p; hsa-miR-363-3p; hsa-miR-200a-3p; hsa-miR-134-5p
Annotations derived over miRTarBase (Gene Ontology)	positive regulation of signaling receptor activity GO2000273	over-represented	1.6e-05	0.0056055	0.0056055	0.382514	5	hsa-miR-381-3p; hsa-miR-200b-3p; hsa-miR-183-5p; hsa-miR-200a-3p; hsa-miR-134-5p
Annotations derived over miRTarBase (Gene Ontology)	positive regulation of endothelial cell apoptotic process GO2000353	over-represented	2.02e-05	0.006474	0.006474	1.13583	7	hsa-miR-30a-5p; hsa-miR-148a-3p; hsa-miR-182-5p; hsa-miR-200b-3p; hsa-miR-183-5p; hsa-miR-363-3p; hsa-miR-200a-3p
Annotations derived over miRTarBase (Gene Ontology)	positive regulation of mitochondrial outer membrane permeabilization involved in apoptotic signaling pathway GO1901030	over-represented	2.15e-05	0.0065933	0.0065933	0.722092	6	hsa-miR-30a-5p; hsa-miR-1246; hsa-miR-148a-3p; hsa-miR-182-5p; hsa-miR-183-5p; hsa-miR-363-3p
Annotations derived over miRTarBase (Gene Ontology)	methylated histone binding GO0035064	over-represented	2.68e-05	0.0078401	0.0078401	3.50117	10	hsa-miR-30a-5p; hsa-miR-1246; hsa-miR-148a-3p; hsa-miR-381-3p; hsa-miR-182-5p; hsa-miR-200b-3p; hsa-miR-183-5p; hsa-miR-363-3p; hsa-miR-200a-3p; hsa-miR-134-5p
Annotations derived over miRTarBase (Gene Ontology)	Wnt signalosome GO1990909	over-represented	3.01e-05	0.0081153	0.0081153	0.765027	6	hsa-miR-30a-5p; hsa-miR-1246; hsa-miR-148a-3p; hsa-miR-182-5p; hsa-miR-183-5p; hsa-miR-200a-3p
Annotations derived over miRTarBase (Gene Ontology)	nuclear euchromatin GO0005719	over-represented	2.92e-05	0.0081153	0.0081153	1.76815	8	hsa-miR-30a-5p; hsa-miR-1246; hsa-miR-148a-3p; hsa-miR-381-3p; hsa-miR-182-5p; hsa-miR-200b-3p; hsa-miR-363-3p; hsa-miR-200a-3p
Annotations derived over miRTarBase (Gene Ontology)	negative regulation of growth rate GO0045967	over-represented	3.83e-05	0.0095431	0.0095431	0.456674	5	hsa-miR-30a-5p; hsa-miR-182-5p; hsa-miR-200b-3p; hsa-miR-183-5p; hsa-miR-363-3p
Annotations derived over miRTarBase (Gene Ontology)	zygotic specification of dorsalventral axis GO0007352	over-represented	3.83e-05	0.0095431	0.0095431	0.456674	5	hsa-miR-148a-3p; hsa-miR-381-3p; hsa-miR-200b-3p; hsa-miR-200a-3p; hsa-miR-134-5p
Diseases (miRWalk)	Lymphoma B-Cell Marginal Zone	over-represented	0.0021787	0.0406683	0.0406683	0.086262	2	hsa-miR-200b-3p; hsa-miR-200a-3p
Diseases (miRWalk)	Nephrosclerosis	over-represented	0.0021787	0.0406683	0.0406683	0.086262	2	hsa-miR-200b-3p; hsa-miR-200a-3p
Diseases (miRWalk)	Proteinuria	over-represented	0.0021787	0.0406683	0.0406683	0.086262	2	hsa-miR-200b-3p; hsa-miR-200a-3p
Diseases (MNDR)	autistic disorder	over-represented	7.09e-12	3.56e-09	3.56e-09	0.267241	8	hsa-miR-30a-5p; hsa-miR-148a-3p; hsa-miR-381-3p; hsa-miR-182-5p; hsa-miR-200b-3p; hsa-miR-183-5p; hsa-miR-363-3p; hsa-miR-200a-3p
Diseases (MNDR)	renal cell carcinoma	over-represented	6.42e-10	1.61e-07	1.61e-07	0.758621	9	hsa-miR-30a-5p; hsa-miR-148a-3p; hsa-miR-381-3p; hsa-miR-182-5p; hsa-miR-200b-3p; hsa-miR-183-5p; hsa-miR-363-3p; hsa-miR-200a-3p; hsa-miR-134-5p
Diseases (MNDR)	Adenoviridae Infections	over-represented	3.74e-09	4.39e-07	4.39e-07	0.331897	7	hsa-miR-30a-5p; hsa-miR-1246; hsa-miR-148a-3p; hsa-miR-182-5p; hsa-miR-200b-3p; hsa-miR-183-5p; hsa-miR-200a-3p
Diseases (MNDR)	Crohns disease	over-represented	2.81e-09	4.39e-07	4.39e-07	0.318966	7	hsa-miR-30a-5p; hsa-miR-1246; hsa-miR-148a-3p; hsa-miR-182-5p; hsa-miR-200b-3p; hsa-miR-183-5p; hsa-miR-200a-3p
Diseases (MNDR)	Muscular Disorders, Atrophic	over-represented	6.99e-09	4.39e-07	4.39e-07	0.362069	7	hsa-miR-30a-5p; hsa-miR-148a-3p; hsa-miR-381-3p; hsa-miR-182-5p; hsa-miR-200b-3p; hsa-miR-183-5p; hsa-miR-200a-3p
Diseases (MNDR)	Uterine Cervical Neoplasms	over-represented	6.24e-09	4.39e-07	4.39e-07	0.607759	8	hsa-miR-30a-5p; hsa-miR-1246; hsa-miR-148a-3p; hsa-miR-182-5p; hsa-miR-200b-3p; hsa-miR-183-5p; hsa-miR-200a-3p; hsa-miR-134-5p
Diseases (MNDR)	hepatitis	over-represented	6.99e-09	4.39e-07	4.39e-07	0.362069	7	hsa-miR-30a-5p; hsa-miR-148a-3p; hsa-miR-182-5p; hsa-miR-200b-3p; hsa-miR-183-5p; hsa-miR-200a-3p; hsa-miR-134-5p
Diseases (MNDR)	uterine cancer	over-represented	4.94e-09	4.39e-07	4.39e-07	0.590517	8	hsa-miR-30a-5p; hsa-miR-148a-3p; hsa-miR-381-3p; hsa-miR-182-5p; hsa-miR-200b-3p; hsa-miR-183-5p; hsa-miR-200a-3p; hsa-miR-134-5p
Diseases (MNDR)	Leukemia, B-Cell	over-represented	2.09e-08	5.24e-07	5.24e-07	0.228448	6	hsa-miR-30a-5p; hsa-miR-148a-3p; hsa-miR-182-5p; hsa-miR-200b-3p; hsa-miR-183-5p; hsa-miR-200a-3p
Diseases (MNDR)	Mouth Neoplasms	over-represented	1.06e-08	5.24e-07	5.24e-07	0.383621	7	hsa-miR-30a-5p; hsa-miR-148a-3p; hsa-miR-182-5p; hsa-miR-200b-3p; hsa-miR-183-5p; hsa-miR-200a-3p; hsa-miR-134-5p
Diseases (MNDR)	Myotonic Dystrophy	over-represented	1.34e-08	5.24e-07	5.24e-07	0.396552	7	hsa-miR-30a-5p; hsa-miR-148a-3p; hsa-miR-381-3p; hsa-miR-182-5p; hsa-miR-200b-3p; hsa-miR-183-5p; hsa-miR-200a-3p
Diseases (MNDR)	Precursor B-Cell Lymphoblastic Leukemia-Lymphoma	over-represented	2.09e-08	5.24e-07	5.24e-07	0.228448	6	hsa-miR-30a-5p; hsa-miR-148a-3p; hsa-miR-182-5p; hsa-miR-200b-3p; hsa-miR-183-5p; hsa-miR-200a-3p
Diseases (MNDR)	Trophoblasts	over-represented	2.09e-08	5.24e-07	5.24e-07	0.228448	6	hsa-miR-30a-5p; hsa-miR-148a-3p; hsa-miR-182-5p; hsa-miR-200b-3p; hsa-miR-183-5p; hsa-miR-200a-3p
Diseases (MNDR)	adrenal cortical adenoma	over-represented	1.85e-08	5.24e-07	5.24e-07	0.224138	6	hsa-miR-30a-5p; hsa-miR-148a-3p; hsa-miR-182-5p; hsa-miR-200b-3p; hsa-miR-183-5p; hsa-miR-200a-3p
Diseases (MNDR)	anxiety disorder	over-represented	1.64e-08	5.24e-07	5.24e-07	0.219828	6	hsa-miR-30a-5p; hsa-miR-148a-3p; hsa-miR-182-5p; hsa-miR-200b-3p; hsa-miR-183-5p; hsa-miR-200a-3p
Diseases (MNDR)	chronic lymphocytic leukemia	over-represented	1.27e-08	5.24e-07	5.24e-07	0.663793	8	hsa-miR-30a-5p; hsa-miR-1246; hsa-miR-148a-3p; hsa-miR-182-5p; hsa-miR-200b-3p; hsa-miR-183-5p; hsa-miR-200a-3p; hsa-miR-134-5p
Diseases (MNDR)	hepatitis B	over-represented	1.81e-08	5.24e-07	5.24e-07	0.413793	7	hsa-miR-30a-5p; hsa-miR-148a-3p; hsa-miR-182-5p; hsa-miR-200b-3p; hsa-miR-183-5p; hsa-miR-200a-3p; hsa-miR-134-5p
Diseases (MNDR)	hepatitis C	over-represented	1.95e-08	5.24e-07	5.24e-07	0.418103	7	hsa-miR-30a-5p; hsa-miR-148a-3p; hsa-miR-182-5p; hsa-miR-200b-3p; hsa-miR-183-5p; hsa-miR-200a-3p; hsa-miR-134-5p
Diseases (MNDR)	interstitial cystitis	over-represented	1.45e-08	5.24e-07	5.24e-07	0.215517	6	hsa-miR-30a-5p; hsa-miR-148a-3p; hsa-miR-182-5p; hsa-miR-200b-3p; hsa-miR-183-5p; hsa-miR-200a-3p
Diseases (MNDR)	psoriasis	over-represented	1.06e-08	5.24e-07	5.24e-07	0.383621	7	hsa-miR-30a-5p; hsa-miR-148a-3p; hsa-miR-381-3p; hsa-miR-182-5p; hsa-miR-200b-3p; hsa-miR-183-5p; hsa-miR-200a-3p
Diseases (MNDR)	Lymphoma, Large-Cell, Anaplastic	over-represented	2.35e-08	5.5e-07	5.5e-07	0.232759	6	hsa-miR-30a-5p; hsa-miR-148a-3p; hsa-miR-182-5p; hsa-miR-200b-3p; hsa-miR-183-5p; hsa-miR-200a-3p
Diseases (MNDR)	Retinal Neovascularization	over-represented	2.63e-08	5.5e-07	5.5e-07	0.237069	6	hsa-miR-30a-5p; hsa-miR-148a-3p; hsa-miR-182-5p; hsa-miR-200b-3p; hsa-miR-183-5p; hsa-miR-200a-3p
Diseases (MNDR)	hepatoblastoma	over-represented	2.63e-08	5.5e-07	5.5e-07	0.237069	6	hsa-miR-30a-5p; hsa-miR-148a-3p; hsa-miR-182-5p; hsa-miR-200b-3p; hsa-miR-183-5p; hsa-miR-200a-3p
Diseases (MNDR)	rheumatoid arthritis	over-represented	2.6e-08	5.5e-07	5.5e-07	0.435345	7	hsa-miR-30a-5p; hsa-miR-1246; hsa-miR-148a-3p; hsa-miR-182-5p; hsa-miR-200b-3p; hsa-miR-363-3p; hsa-miR-200a-3p
Diseases (MNDR)	Lymphoma, T-Cell	over-represented	2.94e-08	5.88e-07	5.88e-07	0.241379	6	hsa-miR-30a-5p; hsa-miR-148a-3p; hsa-miR-182-5p; hsa-miR-200b-3p; hsa-miR-183-5p; hsa-miR-200a-3p
Diseases (MNDR)	hypertrophic cardiomyopathy	over-represented	3.28e-08	5.88e-07	5.88e-07	0.24569	6	hsa-miR-30a-5p; hsa-miR-148a-3p; hsa-miR-182-5p; hsa-miR-200b-3p; hsa-miR-183-5p; hsa-miR-200a-3p
Diseases (MNDR)	small cell carcinoma	over-represented	3.28e-08	5.88e-07	5.88e-07	0.24569	6	hsa-miR-30a-5p; hsa-miR-148a-3p; hsa-miR-182-5p; hsa-miR-200b-3p; hsa-miR-183-5p; hsa-miR-200a-3p
Diseases (MNDR)	urinary bladder cancer	over-represented	3.24e-08	5.88e-07	5.88e-07	0.74569	8	hsa-miR-30a-5p; hsa-miR-148a-3p; hsa-miR-381-3p; hsa-miR-182-5p; hsa-miR-200b-3p; hsa-miR-183-5p; hsa-miR-200a-3p; hsa-miR-134-5p
Diseases (MNDR)	Barretts esophagus	over-represented	4.06e-08	6e-07	6e-07	0.25431	6	hsa-miR-30a-5p; hsa-miR-148a-3p; hsa-miR-182-5p; hsa-miR-200b-3p; hsa-miR-183-5p; hsa-miR-200a-3p
Diseases (MNDR)	adrenocortical carcinoma	over-represented	3.89e-08	6e-07	6e-07	0.762931	8	hsa-miR-30a-5p; hsa-miR-148a-3p; hsa-miR-381-3p; hsa-miR-182-5p; hsa-miR-200b-3p; hsa-miR-183-5p; hsa-miR-200a-3p; hsa-miR-134-5p
Diseases (MNDR)	adult T-cell leukemia	over-represented	3.65e-08	6e-07	6e-07	0.25	6	hsa-miR-30a-5p; hsa-miR-148a-3p; hsa-miR-182-5p; hsa-miR-200b-3p; hsa-miR-183-5p; hsa-miR-200a-3p
Diseases (MNDR)	eosinophilic esophagitis	over-represented	4.06e-08	6e-07	6e-07	0.25431	6	hsa-miR-30a-5p; hsa-miR-148a-3p; hsa-miR-182-5p; hsa-miR-200b-3p; hsa-miR-183-5p; hsa-miR-200a-3p
Diseases (MNDR)	muscular dystrophy	over-represented	3.65e-08	6e-07	6e-07	0.25	6	hsa-miR-30a-5p; hsa-miR-148a-3p; hsa-miR-182-5p; hsa-miR-200b-3p; hsa-miR-183-5p; hsa-miR-200a-3p
Diseases (MNDR)	systemic scleroderma	over-represented	4.06e-08	6e-07	6e-07	0.25431	6	hsa-miR-30a-5p; hsa-miR-148a-3p; hsa-miR-182-5p; hsa-miR-200b-3p; hsa-miR-183-5p; hsa-miR-200a-3p
Diseases (MNDR)	azoospermia	over-represented	4.51e-08	6.46e-07	6.46e-07	0.258621	6	hsa-miR-30a-5p; hsa-miR-148a-3p; hsa-miR-182-5p; hsa-miR-200b-3p; hsa-miR-183-5p; hsa-miR-200a-3p
Diseases (MNDR)	Sepsis	over-represented	5.52e-08	7.38e-07	7.38e-07	0.267241	6	hsa-miR-30a-5p; hsa-miR-148a-3p; hsa-miR-182-5p; hsa-miR-200b-3p; hsa-miR-183-5p; hsa-miR-200a-3p
Diseases (MNDR)	atrial fibrillation	over-represented	5.52e-08	7.38e-07	7.38e-07	0.267241	6	hsa-miR-30a-5p; hsa-miR-148a-3p; hsa-miR-182-5p; hsa-miR-200b-3p; hsa-miR-183-5p; hsa-miR-200a-3p
Diseases (MNDR)	lung small cell carcinoma	over-represented	5.59e-08	7.38e-07	7.38e-07	1.24138	9	hsa-miR-30a-5p; hsa-miR-1246; hsa-miR-148a-3p; hsa-miR-381-3p; hsa-miR-182-5p; hsa-miR-200b-3p; hsa-miR-183-5p; hsa-miR-200a-3p; hsa-miR-134-5p
Diseases (MNDR)	gastrointestinal system cancer	over-represented	6.09e-08	7.64e-07	7.64e-07	0.271552	6	hsa-miR-30a-5p; hsa-miR-148a-3p; hsa-miR-182-5p; hsa-miR-200b-3p; hsa-miR-183-5p; hsa-miR-200a-3p
Diseases (MNDR)	pituitary adenoma	over-represented	5.95e-08	7.64e-07	7.64e-07	1.25	9	hsa-miR-30a-5p; hsa-miR-148a-3p; hsa-miR-381-3p; hsa-miR-182-5p; hsa-miR-200b-3p; hsa-miR-183-5p; hsa-miR-363-3p; hsa-miR-200a-3p; hsa-miR-134-5p
Diseases (MNDR)	acute promyelocytic leukemia	over-represented	6.71e-08	8.21e-07	8.21e-07	0.275862	6	hsa-miR-148a-3p; hsa-miR-182-5p; hsa-miR-200b-3p; hsa-miR-183-5p; hsa-miR-200a-3p; hsa-miR-134-5p
Diseases (MNDR)	squamous cell neoplasm	over-represented	7.38e-08	8.82e-07	8.82e-07	0.280172	6	hsa-miR-30a-5p; hsa-miR-148a-3p; hsa-miR-182-5p; hsa-miR-200b-3p; hsa-miR-183-5p; hsa-miR-200a-3p
Diseases (MNDR)	Laryngeal Neoplasms	over-represented	8.11e-08	9.25e-07	9.25e-07	0.284483	6	hsa-miR-30a-5p; hsa-miR-148a-3p; hsa-miR-182-5p; hsa-miR-200b-3p; hsa-miR-183-5p; hsa-miR-200a-3p
Diseases (MNDR)	myelodysplasticmyeloproliferative neoplasm	over-represented	8.11e-08	9.25e-07	9.25e-07	0.284483	6	hsa-miR-30a-5p; hsa-miR-148a-3p; hsa-miR-182-5p; hsa-miR-200b-3p; hsa-miR-183-5p; hsa-miR-200a-3p
Diseases (MNDR)	Mesothelioma	over-represented	8.89e-08	9.7e-07	9.7e-07	0.288793	6	hsa-miR-30a-5p; hsa-miR-148a-3p; hsa-miR-182-5p; hsa-miR-200b-3p; hsa-miR-183-5p; hsa-miR-200a-3p
Diseases (MNDR)	salivary gland cancer	over-represented	8.89e-08	9.7e-07	9.7e-07	0.288793	6	hsa-miR-30a-5p; hsa-miR-148a-3p; hsa-miR-182-5p; hsa-miR-200b-3p; hsa-miR-183-5p; hsa-miR-200a-3p
Diseases (MNDR)	multiple myeloma	over-represented	9.08e-08	9.7e-07	9.7e-07	1.31034	9	hsa-miR-30a-5p; hsa-miR-1246; hsa-miR-148a-3p; hsa-miR-182-5p; hsa-miR-200b-3p; hsa-miR-183-5p; hsa-miR-363-3p; hsa-miR-200a-3p; hsa-miR-134-5p
Diseases (MNDR)	liver cirrhosis	over-represented	9.73e-08	1.02e-06	1.02e-06	0.293103	6	hsa-miR-30a-5p; hsa-miR-148a-3p; hsa-miR-182-5p; hsa-miR-200b-3p; hsa-miR-183-5p; hsa-miR-200a-3p
Diseases (MNDR)	chronic obstructive pulmonary disease	over-represented	1.16e-07	1.19e-06	1.19e-06	0.301724	6	hsa-miR-30a-5p; hsa-miR-148a-3p; hsa-miR-182-5p; hsa-miR-200b-3p; hsa-miR-183-5p; hsa-miR-200a-3p
Diseases (MNDR)	brain cancer	over-represented	1.38e-07	1.36e-06	1.36e-06	0.310345	6	hsa-miR-30a-5p; hsa-miR-148a-3p; hsa-miR-182-5p; hsa-miR-200b-3p; hsa-miR-183-5p; hsa-miR-200a-3p
Diseases (MNDR)	rectum cancer	over-represented	1.38e-07	1.36e-06	1.36e-06	0.310345	6	hsa-miR-30a-5p; hsa-miR-148a-3p; hsa-miR-182-5p; hsa-miR-200b-3p; hsa-miR-183-5p; hsa-miR-200a-3p
Diseases (MNDR)	Heart Failure	over-represented	1.54e-07	1.49e-06	1.49e-06	0.560345	7	hsa-miR-30a-5p; hsa-miR-148a-3p; hsa-miR-381-3p; hsa-miR-182-5p; hsa-miR-200b-3p; hsa-miR-183-5p; hsa-miR-200a-3p
Diseases (MNDR)	cervical squamous cell carcinoma	over-represented	1.58e-07	1.5e-06	1.5e-06	0.909483	8	hsa-miR-148a-3p; hsa-miR-381-3p; hsa-miR-182-5p; hsa-miR-200b-3p; hsa-miR-183-5p; hsa-miR-363-3p; hsa-miR-200a-3p; hsa-miR-134-5p
Diseases (MNDR)	pulmonary tuberculosis	over-represented	2.08e-07	1.93e-06	1.93e-06	0.331897	6	hsa-miR-30a-5p; hsa-miR-148a-3p; hsa-miR-381-3p; hsa-miR-182-5p; hsa-miR-200b-3p; hsa-miR-200a-3p
Diseases (MNDR)	astrocytoma	over-represented	2.46e-07	2.12e-06	2.12e-06	0.961207	8	hsa-miR-30a-5p; hsa-miR-148a-3p; hsa-miR-182-5p; hsa-miR-200b-3p; hsa-miR-183-5p; hsa-miR-363-3p; hsa-miR-200a-3p; hsa-miR-134-5p
Diseases (MNDR)	head and neck cancer	over-represented	2.37e-07	2.12e-06	2.12e-06	0.956897	8	hsa-miR-30a-5p; hsa-miR-148a-3p; hsa-miR-182-5p; hsa-miR-200b-3p; hsa-miR-183-5p; hsa-miR-363-3p; hsa-miR-200a-3p; hsa-miR-134-5p
Diseases (MNDR)	multiple sclerosis	over-represented	2.62e-07	2.12e-06	2.12e-06	0.344828	6	hsa-miR-30a-5p; hsa-miR-148a-3p; hsa-miR-182-5p; hsa-miR-200b-3p; hsa-miR-183-5p; hsa-miR-200a-3p
Diseases (MNDR)	myocardial infarction	over-represented	2.62e-07	2.12e-06	2.12e-06	0.344828	6	hsa-miR-30a-5p; hsa-miR-148a-3p; hsa-miR-182-5p; hsa-miR-200b-3p; hsa-miR-183-5p; hsa-miR-200a-3p
Diseases (MNDR)	prolactinoma	over-represented	2.43e-07	2.12e-06	2.12e-06	0.340517	6	hsa-miR-30a-5p; hsa-miR-148a-3p; hsa-miR-182-5p; hsa-miR-200b-3p; hsa-miR-183-5p; hsa-miR-200a-3p
Diseases (MNDR)	retinoblastoma	over-represented	2.55e-07	2.12e-06	2.12e-06	0.965517	8	hsa-miR-30a-5p; hsa-miR-1246; hsa-miR-148a-3p; hsa-miR-182-5p; hsa-miR-200b-3p; hsa-miR-183-5p; hsa-miR-363-3p; hsa-miR-200a-3p
Diseases (MNDR)	systemic lupus erythematosus	over-represented	2.62e-07	2.12e-06	2.12e-06	0.344828	6	hsa-miR-30a-5p; hsa-miR-148a-3p; hsa-miR-182-5p; hsa-miR-200b-3p; hsa-miR-183-5p; hsa-miR-200a-3p
Diseases (MNDR)	thyroid cancer	over-represented	2.37e-07	2.12e-06	2.12e-06	0.956897	8	hsa-miR-30a-5p; hsa-miR-148a-3p; hsa-miR-381-3p; hsa-miR-182-5p; hsa-miR-200b-3p; hsa-miR-183-5p; hsa-miR-363-3p; hsa-miR-200a-3p
Diseases (MNDR)	pre-eclampsia	over-represented	3.05e-07	2.39e-06	2.39e-06	0.353448	6	hsa-miR-30a-5p; hsa-miR-148a-3p; hsa-miR-182-5p; hsa-miR-200b-3p; hsa-miR-183-5p; hsa-miR-200a-3p
Diseases (MNDR)	syndrome	over-represented	3.05e-07	2.39e-06	2.39e-06	0.353448	6	hsa-miR-148a-3p; hsa-miR-182-5p; hsa-miR-200b-3p; hsa-miR-183-5p; hsa-miR-200a-3p; hsa-miR-134-5p
Diseases (MNDR)	Carcinoma, Non-Small-Cell Lung	over-represented	3.6e-07	2.78e-06	2.78e-06	1.00862	8	hsa-miR-30a-5p; hsa-miR-1246; hsa-miR-148a-3p; hsa-miR-182-5p; hsa-miR-200b-3p; hsa-miR-183-5p; hsa-miR-200a-3p; hsa-miR-134-5p
Diseases (MNDR)	coronary artery disease	over-represented	4.36e-07	3.32e-06	3.32e-06	0.375	6	hsa-miR-30a-5p; hsa-miR-148a-3p; hsa-miR-182-5p; hsa-miR-200b-3p; hsa-miR-183-5p; hsa-miR-200a-3p
Diseases (MNDR)	papillary thyroid carcinoma	over-represented	5.36e-07	4.01e-06	4.01e-06	0.387931	6	hsa-miR-148a-3p; hsa-miR-182-5p; hsa-miR-200b-3p; hsa-miR-183-5p; hsa-miR-200a-3p; hsa-miR-134-5p
Diseases (MNDR)	intellectual disability	over-represented	6.7e-07	4.95e-06	4.95e-06	1.63793	9	hsa-miR-30a-5p; hsa-miR-148a-3p; hsa-miR-381-3p; hsa-miR-182-5p; hsa-miR-200b-3p; hsa-miR-183-5p; hsa-miR-363-3p; hsa-miR-200a-3p; hsa-miR-134-5p
Diseases (MNDR)	B-cell lymphoma	over-represented	7.11e-07	5.18e-06	5.18e-06	1.09914	8	hsa-miR-30a-5p; hsa-miR-148a-3p; hsa-miR-182-5p; hsa-miR-200b-3p; hsa-miR-183-5p; hsa-miR-363-3p; hsa-miR-200a-3p; hsa-miR-134-5p
Diseases (MNDR)	retinal degeneration	over-represented	7.9e-07	5.67e-06	5.67e-06	0.413793	6	hsa-miR-30a-5p; hsa-miR-148a-3p; hsa-miR-182-5p; hsa-miR-200b-3p; hsa-miR-183-5p; hsa-miR-200a-3p
Diseases (MNDR)	liposarcoma	over-represented	8.49e-07	6e-06	6e-06	0.715517	7	hsa-miR-30a-5p; hsa-miR-148a-3p; hsa-miR-381-3p; hsa-miR-182-5p; hsa-miR-200b-3p; hsa-miR-183-5p; hsa-miR-363-3p
Diseases (MNDR)	alopecia	over-represented	8.82e-07	6.07e-06	6.07e-06	0.215517	5	hsa-miR-148a-3p; hsa-miR-182-5p; hsa-miR-200b-3p; hsa-miR-183-5p; hsa-miR-200a-3p
Diseases (MNDR)	biliary tract neoplasm	over-represented	8.82e-07	6.07e-06	6.07e-06	0.215517	5	hsa-miR-30a-5p; hsa-miR-148a-3p; hsa-miR-182-5p; hsa-miR-200b-3p; hsa-miR-200a-3p
Diseases (MNDR)	endometriosis	over-represented	8.94e-07	6.07e-06	6.07e-06	0.422414	6	hsa-miR-30a-5p; hsa-miR-148a-3p; hsa-miR-182-5p; hsa-miR-200b-3p; hsa-miR-183-5p; hsa-miR-200a-3p
Diseases (MNDR)	Acute Coronary Syndrome	over-represented	9.76e-07	6.45e-06	6.45e-06	0.219828	5	hsa-miR-30a-5p; hsa-miR-148a-3p; hsa-miR-182-5p; hsa-miR-200b-3p; hsa-miR-200a-3p
Diseases (MNDR)	Atrophy	over-represented	9.76e-07	6.45e-06	6.45e-06	0.219828	5	hsa-miR-30a-5p; hsa-miR-148a-3p; hsa-miR-182-5p; hsa-miR-200b-3p; hsa-miR-134-5p
Diseases (MNDR)	Hearing Loss	over-represented	1.08e-06	6.6e-06	6.6e-06	0.224138	5	hsa-miR-148a-3p; hsa-miR-182-5p; hsa-miR-200b-3p; hsa-miR-183-5p; hsa-miR-134-5p
Diseases (MNDR)	Myocardium	over-represented	1.08e-06	6.6e-06	6.6e-06	0.224138	5	hsa-miR-30a-5p; hsa-miR-148a-3p; hsa-miR-182-5p; hsa-miR-200b-3p; hsa-miR-200a-3p
Diseases (MNDR)	Pain	over-represented	1.08e-06	6.6e-06	6.6e-06	0.224138	5	hsa-miR-148a-3p; hsa-miR-182-5p; hsa-miR-200b-3p; hsa-miR-183-5p; hsa-miR-200a-3p
Diseases (MNDR)	adrenal cortex cancer	over-represented	1.08e-06	6.6e-06	6.6e-06	0.224138	5	hsa-miR-148a-3p; hsa-miR-182-5p; hsa-miR-200b-3p; hsa-miR-183-5p; hsa-miR-200a-3p
Diseases (MNDR)	endometrial cancer	over-represented	1.07e-06	6.6e-06	6.6e-06	0.435345	6	hsa-miR-30a-5p; hsa-miR-148a-3p; hsa-miR-182-5p; hsa-miR-200b-3p; hsa-miR-183-5p; hsa-miR-200a-3p
Diseases (MNDR)	testicular cancer	over-represented	1.08e-06	6.6e-06	6.6e-06	0.224138	5	hsa-miR-30a-5p; hsa-miR-182-5p; hsa-miR-200b-3p; hsa-miR-183-5p; hsa-miR-200a-3p
Diseases (MNDR)	Chemical and Drug Induced Liver Injury	over-represented	1.19e-06	6.63e-06	6.63e-06	0.228448	5	hsa-miR-148a-3p; hsa-miR-182-5p; hsa-miR-200b-3p; hsa-miR-200a-3p; hsa-miR-134-5p
Diseases (MNDR)	Fatty Liver	over-represented	1.19e-06	6.63e-06	6.63e-06	0.228448	5	hsa-miR-148a-3p; hsa-miR-182-5p; hsa-miR-200b-3p; hsa-miR-183-5p; hsa-miR-200a-3p
Diseases (MNDR)	Liver Failure	over-represented	1.19e-06	6.63e-06	6.63e-06	0.228448	5	hsa-miR-148a-3p; hsa-miR-182-5p; hsa-miR-200b-3p; hsa-miR-183-5p; hsa-miR-200a-3p
Diseases (MNDR)	Lymphoma, Primary Effusion	over-represented	1.19e-06	6.63e-06	6.63e-06	0.228448	5	hsa-miR-30a-5p; hsa-miR-148a-3p; hsa-miR-182-5p; hsa-miR-200b-3p; hsa-miR-200a-3p
Diseases (MNDR)	cerebral infarction	over-represented	1.19e-06	6.63e-06	6.63e-06	0.228448	5	hsa-miR-148a-3p; hsa-miR-182-5p; hsa-miR-200b-3p; hsa-miR-183-5p; hsa-miR-200a-3p
Diseases (MNDR)	periodontal disease	over-represented	1.19e-06	6.63e-06	6.63e-06	0.228448	5	hsa-miR-30a-5p; hsa-miR-148a-3p; hsa-miR-182-5p; hsa-miR-200b-3p; hsa-miR-200a-3p
Diseases (MNDR)	thoracic aortic aneurysm	over-represented	1.19e-06	6.63e-06	6.63e-06	0.228448	5	hsa-miR-30a-5p; hsa-miR-148a-3p; hsa-miR-182-5p; hsa-miR-200b-3p; hsa-miR-200a-3p
Diseases (MNDR)	toxoplasmosis	over-represented	1.19e-06	6.63e-06	6.63e-06	0.228448	5	hsa-miR-30a-5p; hsa-miR-182-5p; hsa-miR-200b-3p; hsa-miR-183-5p; hsa-miR-200a-3p
Diseases (MNDR)	Huntingtons disease	over-represented	1.25e-06	6.84e-06	6.84e-06	1.18103	8	hsa-miR-30a-5p; hsa-miR-148a-3p; hsa-miR-381-3p; hsa-miR-182-5p; hsa-miR-200b-3p; hsa-miR-183-5p; hsa-miR-363-3p; hsa-miR-200a-3p
Diseases (MNDR)	Precursor Cell Lymphoblastic Leukemia-Lymphoma	over-represented	1.27e-06	6.84e-06	6.84e-06	0.758621	7	hsa-miR-30a-5p; hsa-miR-148a-3p; hsa-miR-182-5p; hsa-miR-200b-3p; hsa-miR-183-5p; hsa-miR-200a-3p; hsa-miR-134-5p
Diseases (MNDR)	Urinary Bladder Neoplasms	over-represented	1.28e-06	6.84e-06	6.84e-06	0.448276	6	hsa-miR-30a-5p; hsa-miR-148a-3p; hsa-miR-182-5p; hsa-miR-200b-3p; hsa-miR-183-5p; hsa-miR-200a-3p
Diseases (MNDR)	angiosarcoma	over-represented	1.31e-06	6.84e-06	6.84e-06	0.232759	5	hsa-miR-30a-5p; hsa-miR-148a-3p; hsa-miR-182-5p; hsa-miR-200b-3p; hsa-miR-183-5p
Diseases (MNDR)	cardiomyopathy	over-represented	1.31e-06	6.84e-06	6.84e-06	0.232759	5	hsa-miR-148a-3p; hsa-miR-182-5p; hsa-miR-200b-3p; hsa-miR-183-5p; hsa-miR-200a-3p
Diseases (MNDR)	choriocarcinoma	over-represented	1.31e-06	6.84e-06	6.84e-06	0.232759	5	hsa-miR-148a-3p; hsa-miR-182-5p; hsa-miR-200b-3p; hsa-miR-183-5p; hsa-miR-200a-3p
Diseases (MNDR)	Duchenne muscular dystrophy	over-represented	1.35e-06	7e-06	7e-06	0.452586	6	hsa-miR-30a-5p; hsa-miR-148a-3p; hsa-miR-381-3p; hsa-miR-182-5p; hsa-miR-200b-3p; hsa-miR-200a-3p
Diseases (MNDR)	Musculoskeletal Abnormalities	over-represented	1.44e-06	7.21e-06	7.21e-06	0.237069	5	hsa-miR-30a-5p; hsa-miR-148a-3p; hsa-miR-182-5p; hsa-miR-200b-3p; hsa-miR-183-5p
Diseases (MNDR)	Toxoplasma	over-represented	1.44e-06	7.21e-06	7.21e-06	0.237069	5	hsa-miR-30a-5p; hsa-miR-148a-3p; hsa-miR-182-5p; hsa-miR-200b-3p; hsa-miR-183-5p
Diseases (MNDR)	hand, foot and mouth disease	over-represented	1.44e-06	7.21e-06	7.21e-06	0.237069	5	hsa-miR-30a-5p; hsa-miR-148a-3p; hsa-miR-182-5p; hsa-miR-200b-3p; hsa-miR-183-5p
Diseases (MNDR)	Myocytes, Cardiac	over-represented	1.57e-06	7.52e-06	7.52e-06	0.241379	5	hsa-miR-30a-5p; hsa-miR-182-5p; hsa-miR-200b-3p; hsa-miR-183-5p; hsa-miR-200a-3p
Diseases (MNDR)	ischemia	over-represented	1.57e-06	7.52e-06	7.52e-06	0.241379	5	hsa-miR-30a-5p; hsa-miR-148a-3p; hsa-miR-182-5p; hsa-miR-200b-3p; hsa-miR-200a-3p
Diseases (MNDR)	lymphoplasmacytic lymphoma	over-represented	1.57e-06	7.52e-06	7.52e-06	0.241379	5	hsa-miR-30a-5p; hsa-miR-182-5p; hsa-miR-200b-3p; hsa-miR-363-3p; hsa-miR-200a-3p
Diseases (MNDR)	nephrosclerosis	over-represented	1.57e-06	7.52e-06	7.52e-06	0.241379	5	hsa-miR-148a-3p; hsa-miR-182-5p; hsa-miR-200b-3p; hsa-miR-183-5p; hsa-miR-200a-3p
Diseases (MNDR)	obesity	over-represented	1.57e-06	7.52e-06	7.52e-06	0.241379	5	hsa-miR-30a-5p; hsa-miR-148a-3p; hsa-miR-182-5p; hsa-miR-200b-3p; hsa-miR-183-5p
Diseases (MNDR)	atherosclerosis	over-represented	1.6e-06	7.58e-06	7.58e-06	0.465517	6	hsa-miR-30a-5p; hsa-miR-148a-3p; hsa-miR-182-5p; hsa-miR-200b-3p; hsa-miR-183-5p; hsa-miR-200a-3p
Diseases (MNDR)	Myeloproliferative Disorders	over-represented	1.72e-06	8.08e-06	8.08e-06	0.24569	5	hsa-miR-30a-5p; hsa-miR-148a-3p; hsa-miR-182-5p; hsa-miR-200b-3p; hsa-miR-200a-3p
Diseases (MNDR)	Ehrlich tumor carcinoma	over-represented	1.88e-06	8.26e-06	8.26e-06	0.25	5	hsa-miR-148a-3p; hsa-miR-182-5p; hsa-miR-200b-3p; hsa-miR-183-5p; hsa-miR-200a-3p
Diseases (MNDR)	Helplessness, Learned	over-represented	1.88e-06	8.26e-06	8.26e-06	0.25	5	hsa-miR-148a-3p; hsa-miR-182-5p; hsa-miR-200b-3p; hsa-miR-183-5p; hsa-miR-200a-3p
Diseases (MNDR)	Pheochromocytoma	over-represented	1.88e-06	8.26e-06	8.26e-06	0.25	5	hsa-miR-148a-3p; hsa-miR-182-5p; hsa-miR-200b-3p; hsa-miR-183-5p; hsa-miR-200a-3p
Diseases (MNDR)	hematologic cancer	over-represented	1.88e-06	8.26e-06	8.26e-06	0.25	5	hsa-miR-30a-5p; hsa-miR-148a-3p; hsa-miR-182-5p; hsa-miR-200b-3p; hsa-miR-183-5p
Diseases (MNDR)	myeloid leukemia	over-represented	1.88e-06	8.26e-06	8.26e-06	0.25	5	hsa-miR-30a-5p; hsa-miR-148a-3p; hsa-miR-182-5p; hsa-miR-200b-3p; hsa-miR-183-5p
Diseases (MNDR)	oral squamous cell carcinoma	over-represented	1.89e-06	8.26e-06	8.26e-06	1.84052	9	hsa-miR-30a-5p; hsa-miR-1246; hsa-miR-148a-3p; hsa-miR-381-3p; hsa-miR-200b-3p; hsa-miR-183-5p; hsa-miR-363-3p; hsa-miR-200a-3p; hsa-miR-134-5p
Diseases (MNDR)	polycythemia vera	over-represented	1.88e-06	8.26e-06	8.26e-06	0.25	5	hsa-miR-30a-5p; hsa-miR-148a-3p; hsa-miR-182-5p; hsa-miR-200b-3p; hsa-miR-200a-3p
Diseases (MNDR)	progesterone-receptor negative breast cancer	over-represented	1.85e-06	8.26e-06	8.26e-06	2.68534	10	hsa-miR-30a-5p; hsa-miR-1246; hsa-miR-148a-3p; hsa-miR-381-3p; hsa-miR-182-5p; hsa-miR-200b-3p; hsa-miR-183-5p; hsa-miR-363-3p; hsa-miR-200a-3p; hsa-miR-134-5p
Diseases (MNDR)	Hypertrophy	over-represented	2.05e-06	8.72e-06	8.72e-06	0.25431	5	hsa-miR-30a-5p; hsa-miR-148a-3p; hsa-miR-182-5p; hsa-miR-200b-3p; hsa-miR-200a-3p
Diseases (MNDR)	aortic valve stenosis	over-represented	2.05e-06	8.72e-06	8.72e-06	0.25431	5	hsa-miR-30a-5p; hsa-miR-148a-3p; hsa-miR-200b-3p; hsa-miR-200a-3p; hsa-miR-134-5p
Diseases (MNDR)	tongue cancer	over-represented	2.05e-06	8.72e-06	8.72e-06	0.25431	5	hsa-miR-148a-3p; hsa-miR-182-5p; hsa-miR-200b-3p; hsa-miR-183-5p; hsa-miR-200a-3p
Diseases (MNDR)	triple-receptor negative breast cancer	over-represented	2.11e-06	8.91e-06	8.91e-06	0.107759	4	hsa-miR-30a-5p; hsa-miR-182-5p; hsa-miR-200b-3p; hsa-miR-200a-3p
Diseases (MNDR)	Stroke	over-represented	2.23e-06	9.11e-06	9.11e-06	0.258621	5	hsa-miR-30a-5p; hsa-miR-148a-3p; hsa-miR-182-5p; hsa-miR-200b-3p; hsa-miR-200a-3p
Diseases (MNDR)	osteosarcoma	over-represented	2.19e-06	9.11e-06	9.11e-06	1.87069	9	hsa-miR-30a-5p; hsa-miR-148a-3p; hsa-miR-381-3p; hsa-miR-182-5p; hsa-miR-200b-3p; hsa-miR-183-5p; hsa-miR-363-3p; hsa-miR-200a-3p; hsa-miR-134-5p
Diseases (MNDR)	ovarian clear cell carcinoma	over-represented	2.21e-06	9.11e-06	9.11e-06	0.491379	6	hsa-miR-30a-5p; hsa-miR-381-3p; hsa-miR-182-5p; hsa-miR-200b-3p; hsa-miR-183-5p; hsa-miR-200a-3p
Diseases (MNDR)	skin cancer	over-represented	2.23e-06	9.11e-06	9.11e-06	0.258621	5	hsa-miR-30a-5p; hsa-miR-148a-3p; hsa-miR-182-5p; hsa-miR-200b-3p; hsa-miR-183-5p
Diseases (MNDR)	Kaposis sarcoma	over-represented	2.43e-06	9.83e-06	9.83e-06	0.262931	5	hsa-miR-30a-5p; hsa-miR-148a-3p; hsa-miR-182-5p; hsa-miR-200b-3p; hsa-miR-200a-3p
Diseases (MNDR)	Neoplasms	over-represented	2.45e-06	9.85e-06	9.85e-06	0.5	6	hsa-miR-30a-5p; hsa-miR-148a-3p; hsa-miR-182-5p; hsa-miR-200b-3p; hsa-miR-183-5p; hsa-miR-200a-3p
Diseases (MNDR)	nephroblastoma	over-represented	2.54e-06	1.01e-05	1.01e-05	2.77155	10	hsa-miR-30a-5p; hsa-miR-1246; hsa-miR-148a-3p; hsa-miR-381-3p; hsa-miR-182-5p; hsa-miR-200b-3p; hsa-miR-183-5p; hsa-miR-363-3p; hsa-miR-200a-3p; hsa-miR-134-5p
Diseases (MNDR)	Cardiovascular Diseases	over-represented	2.64e-06	1.03e-05	1.03e-05	0.267241	5	hsa-miR-1246; hsa-miR-148a-3p; hsa-miR-182-5p; hsa-miR-200b-3p; hsa-miR-134-5p
Diseases (MNDR)	mantle cell lymphoma	over-represented	2.64e-06	1.03e-05	1.03e-05	0.267241	5	hsa-miR-30a-5p; hsa-miR-148a-3p; hsa-miR-182-5p; hsa-miR-200b-3p; hsa-miR-183-5p
Diseases (MNDR)	Ovarian Neoplasms	over-represented	2.79e-06	1.08e-05	1.08e-05	1.92241	9	hsa-miR-30a-5p; hsa-miR-1246; hsa-miR-148a-3p; hsa-miR-381-3p; hsa-miR-182-5p; hsa-miR-200b-3p; hsa-miR-183-5p; hsa-miR-200a-3p; hsa-miR-134-5p
Diseases (MNDR)	adenocarcinoma	over-represented	2.85e-06	1.1e-05	1.1e-05	0.512931	6	hsa-miR-30a-5p; hsa-miR-148a-3p; hsa-miR-182-5p; hsa-miR-200b-3p; hsa-miR-183-5p; hsa-miR-200a-3p
Diseases (MNDR)	carotid artery disease	over-represented	2.86e-06	1.1e-05	1.1e-05	0.271552	5	hsa-miR-30a-5p; hsa-miR-148a-3p; hsa-miR-182-5p; hsa-miR-200b-3p; hsa-miR-134-5p
Diseases (MNDR)	renal clear cell carcinoma	over-represented	3.02e-06	1.15e-05	1.15e-05	1.93966	9	hsa-miR-30a-5p; hsa-miR-148a-3p; hsa-miR-381-3p; hsa-miR-182-5p; hsa-miR-200b-3p; hsa-miR-183-5p; hsa-miR-363-3p; hsa-miR-200a-3p; hsa-miR-134-5p
Diseases (MNDR)	Burkitt lymphoma	over-represented	3.07e-06	1.15e-05	1.15e-05	0.862069	7	hsa-miR-30a-5p; hsa-miR-148a-3p; hsa-miR-182-5p; hsa-miR-200b-3p; hsa-miR-183-5p; hsa-miR-200a-3p; hsa-miR-134-5p
Diseases (MNDR)	IgA glomerulonephritis	over-represented	3.09e-06	1.15e-05	1.15e-05	0.275862	5	hsa-miR-148a-3p; hsa-miR-182-5p; hsa-miR-200b-3p; hsa-miR-183-5p; hsa-miR-200a-3p
Diseases (MNDR)	Inflammation	over-represented	3.09e-06	1.15e-05	1.15e-05	0.275862	5	hsa-miR-30a-5p; hsa-miR-148a-3p; hsa-miR-182-5p; hsa-miR-200b-3p; hsa-miR-200a-3p
Diseases (MNDR)	HIV	over-represented	3.35e-06	1.24e-05	1.24e-05	0.280172	5	hsa-miR-30a-5p; hsa-miR-148a-3p; hsa-miR-182-5p; hsa-miR-200b-3p; hsa-miR-200a-3p
Diseases (MNDR)	papillary renal cell carcinoma	over-represented	3.39e-06	1.24e-05	1.24e-05	1.96552	9	hsa-miR-30a-5p; hsa-miR-148a-3p; hsa-miR-381-3p; hsa-miR-182-5p; hsa-miR-200b-3p; hsa-miR-183-5p; hsa-miR-363-3p; hsa-miR-200a-3p; hsa-miR-134-5p
Diseases (MNDR)	Ewing sarcoma	over-represented	3.61e-06	1.31e-05	1.31e-05	0.284483	5	hsa-miR-30a-5p; hsa-miR-148a-3p; hsa-miR-182-5p; hsa-miR-200b-3p; hsa-miR-200a-3p
Diseases (MNDR)	Diabetic Nephropathies	over-represented	3.9e-06	1.41e-05	1.41e-05	0.288793	5	hsa-miR-30a-5p; hsa-miR-182-5p; hsa-miR-200b-3p; hsa-miR-183-5p; hsa-miR-200a-3p
Diseases (MNDR)	medulloblastoma	over-represented	4.03e-06	1.44e-05	1.44e-05	1.37069	8	hsa-miR-30a-5p; hsa-miR-148a-3p; hsa-miR-182-5p; hsa-miR-200b-3p; hsa-miR-183-5p; hsa-miR-363-3p; hsa-miR-200a-3p; hsa-miR-134-5p
Diseases (MNDR)	Wounds and Injuries	over-represented	4.2e-06	1.49e-05	1.49e-05	0.293103	5	hsa-miR-182-5p; hsa-miR-200b-3p; hsa-miR-183-5p; hsa-miR-363-3p; hsa-miR-200a-3p
Diseases (MNDR)	lung cancer	over-represented	4.21e-06	1.49e-05	1.49e-05	2.91379	10	hsa-miR-30a-5p; hsa-miR-1246; hsa-miR-148a-3p; hsa-miR-381-3p; hsa-miR-182-5p; hsa-miR-200b-3p; hsa-miR-183-5p; hsa-miR-363-3p; hsa-miR-200a-3p; hsa-miR-134-5p
Diseases (MNDR)	squamous cell carcinoma	over-represented	4.29e-06	1.51e-05	1.51e-05	0.905172	7	hsa-miR-30a-5p; hsa-miR-148a-3p; hsa-miR-182-5p; hsa-miR-200b-3p; hsa-miR-183-5p; hsa-miR-363-3p; hsa-miR-200a-3p
Diseases (MNDR)	rectum adenocarcinoma	over-represented	4.34e-06	1.51e-05	1.51e-05	1.38362	8	hsa-miR-30a-5p; hsa-miR-148a-3p; hsa-miR-381-3p; hsa-miR-182-5p; hsa-miR-200b-3p; hsa-miR-183-5p; hsa-miR-363-3p; hsa-miR-200a-3p
Diseases (MNDR)	osteoarthritis	over-represented	4.52e-06	1.56e-05	1.56e-05	0.297414	5	hsa-miR-30a-5p; hsa-miR-148a-3p; hsa-miR-182-5p; hsa-miR-200b-3p; hsa-miR-200a-3p
Diseases (MNDR)	Multiple Sclerosis, Chronic Progressive	over-represented	4.73e-06	1.62e-05	1.62e-05	0.918103	7	hsa-miR-30a-5p; hsa-miR-1246; hsa-miR-148a-3p; hsa-miR-200b-3p; hsa-miR-363-3p; hsa-miR-200a-3p; hsa-miR-134-5p
Diseases (MNDR)	Alzheimers disease	over-represented	4.87e-06	1.66e-05	1.66e-05	2.04741	9	hsa-miR-30a-5p; hsa-miR-148a-3p; hsa-miR-381-3p; hsa-miR-182-5p; hsa-miR-200b-3p; hsa-miR-183-5p; hsa-miR-363-3p; hsa-miR-200a-3p; hsa-miR-134-5p
Diseases (MNDR)	large cell neuroendocrine cancer	over-represented	5.05e-06	1.71e-05	1.71e-05	0.564655	6	hsa-miR-30a-5p; hsa-miR-1246; hsa-miR-182-5p; hsa-miR-200b-3p; hsa-miR-183-5p; hsa-miR-200a-3p
Diseases (MNDR)	facioscapulohumeral muscular dystrophy	over-represented	5.22e-06	1.73e-05	1.73e-05	0.306034	5	hsa-miR-148a-3p; hsa-miR-182-5p; hsa-miR-200b-3p; hsa-miR-363-3p; hsa-miR-200a-3p
Diseases (MNDR)	follicular thyroid carcinoma	over-represented	5.19e-06	1.73e-05	1.73e-05	0.133621	4	hsa-miR-182-5p; hsa-miR-200b-3p; hsa-miR-183-5p; hsa-miR-200a-3p
Diseases (MNDR)	lupus nephritis	over-represented	5.22e-06	1.73e-05	1.73e-05	0.306034	5	hsa-miR-30a-5p; hsa-miR-381-3p; hsa-miR-182-5p; hsa-miR-200b-3p; hsa-miR-200a-3p
Diseases (MNDR)	lung adenocarcinoma	over-represented	5.4e-06	1.78e-05	1.78e-05	2.98707	10	hsa-miR-30a-5p; hsa-miR-1246; hsa-miR-148a-3p; hsa-miR-381-3p; hsa-miR-182-5p; hsa-miR-200b-3p; hsa-miR-183-5p; hsa-miR-363-3p; hsa-miR-200a-3p; hsa-miR-134-5p
Diseases (MNDR)	dilated cardiomyopathy	over-represented	5.77e-06	1.89e-05	1.89e-05	0.577586	6	hsa-miR-30a-5p; hsa-miR-148a-3p; hsa-miR-381-3p; hsa-miR-182-5p; hsa-miR-200b-3p; hsa-miR-200a-3p
Diseases (MNDR)	HIV Infections	over-represented	6e-06	1.94e-05	1.94e-05	0.314655	5	hsa-miR-148a-3p; hsa-miR-182-5p; hsa-miR-200b-3p; hsa-miR-200a-3p; hsa-miR-134-5p
Diseases (MNDR)	basal cell carcinoma	over-represented	6e-06	1.94e-05	1.94e-05	0.314655	5	hsa-miR-148a-3p; hsa-miR-182-5p; hsa-miR-200b-3p; hsa-miR-183-5p; hsa-miR-200a-3p
Diseases (MNDR)	Breast Neoplasms	over-represented	6.99e-06	2.25e-05	2.25e-05	3.06466	10	hsa-miR-30a-5p; hsa-miR-1246; hsa-miR-148a-3p; hsa-miR-381-3p; hsa-miR-182-5p; hsa-miR-200b-3p; hsa-miR-183-5p; hsa-miR-363-3p; hsa-miR-200a-3p; hsa-miR-134-5p
Diseases (MNDR)	Prostatic Neoplasms	over-represented	7.27e-06	2.32e-05	2.32e-05	1.47845	8	hsa-miR-30a-5p; hsa-miR-148a-3p; hsa-miR-182-5p; hsa-miR-200b-3p; hsa-miR-183-5p; hsa-miR-363-3p; hsa-miR-200a-3p; hsa-miR-134-5p
Diseases (MNDR)	Parkinsons disease	over-represented	7.75e-06	2.46e-05	2.46e-05	0.987069	7	hsa-miR-30a-5p; hsa-miR-148a-3p; hsa-miR-182-5p; hsa-miR-200b-3p; hsa-miR-183-5p; hsa-miR-200a-3p; hsa-miR-134-5p
Diseases (MNDR)	lymphoma	over-represented	8.22e-06	2.6e-05	2.6e-05	2.17241	9	hsa-miR-30a-5p; hsa-miR-148a-3p; hsa-miR-381-3p; hsa-miR-182-5p; hsa-miR-200b-3p; hsa-miR-183-5p; hsa-miR-363-3p; hsa-miR-200a-3p; hsa-miR-134-5p
Diseases (MNDR)	type 2 diabetes mellitus	over-represented	8.35e-06	2.6e-05	2.6e-05	0.336207	5	hsa-miR-30a-5p; hsa-miR-148a-3p; hsa-miR-182-5p; hsa-miR-200b-3p; hsa-miR-200a-3p
Diseases (MNDR)	ulcerative colitis	over-represented	8.35e-06	2.6e-05	2.6e-05	0.336207	5	hsa-miR-1246; hsa-miR-148a-3p; hsa-miR-182-5p; hsa-miR-200b-3p; hsa-miR-200a-3p
Diseases (MNDR)	neuroblastoma	over-represented	9.19e-06	2.85e-05	2.85e-05	0.625	6	hsa-miR-30a-5p; hsa-miR-148a-3p; hsa-miR-182-5p; hsa-miR-200b-3p; hsa-miR-183-5p; hsa-miR-200a-3p
Diseases (MNDR)	cervical adenocarcinoma	over-represented	1.01e-05	3.1e-05	3.1e-05	0.349138	5	hsa-miR-30a-5p; hsa-miR-200b-3p; hsa-miR-363-3p; hsa-miR-200a-3p; hsa-miR-134-5p
Diseases (MNDR)	malignant glioma	over-represented	1.03e-05	3.16e-05	3.16e-05	3.18534	10	hsa-miR-30a-5p; hsa-miR-1246; hsa-miR-148a-3p; hsa-miR-381-3p; hsa-miR-182-5p; hsa-miR-200b-3p; hsa-miR-183-5p; hsa-miR-363-3p; hsa-miR-200a-3p; hsa-miR-134-5p
Diseases (MNDR)	meningioma	over-represented	1.08e-05	3.28e-05	3.28e-05	0.642241	6	hsa-miR-30a-5p; hsa-miR-148a-3p; hsa-miR-182-5p; hsa-miR-200b-3p; hsa-miR-183-5p; hsa-miR-200a-3p
Diseases (MNDR)	Hodgkins lymphoma	over-represented	1.13e-05	3.39e-05	3.39e-05	1.56466	8	hsa-miR-30a-5p; hsa-miR-1246; hsa-miR-148a-3p; hsa-miR-182-5p; hsa-miR-200b-3p; hsa-miR-183-5p; hsa-miR-363-3p; hsa-miR-200a-3p
Diseases (MNDR)	ovarian carcinoma	over-represented	1.13e-05	3.39e-05	3.39e-05	1.0431	7	hsa-miR-30a-5p; hsa-miR-381-3p; hsa-miR-182-5p; hsa-miR-200b-3p; hsa-miR-183-5p; hsa-miR-200a-3p; hsa-miR-134-5p
Diseases (MNDR)	Glioblastoma	over-represented	1.35e-05	4.03e-05	4.03e-05	3.27155	10	hsa-miR-30a-5p; hsa-miR-1246; hsa-miR-148a-3p; hsa-miR-381-3p; hsa-miR-182-5p; hsa-miR-200b-3p; hsa-miR-183-5p; hsa-miR-363-3p; hsa-miR-200a-3p; hsa-miR-134-5p
Diseases (MNDR)	Non-alcoholic Fatty Liver Disease	over-represented	1.36e-05	4.03e-05	4.03e-05	0.37069	5	hsa-miR-30a-5p; hsa-miR-182-5p; hsa-miR-200b-3p; hsa-miR-183-5p; hsa-miR-200a-3p
Diseases (MNDR)	diffuse large B-cell lymphoma	over-represented	1.44e-05	4.25e-05	4.25e-05	0.375	5	hsa-miR-30a-5p; hsa-miR-148a-3p; hsa-miR-182-5p; hsa-miR-200b-3p; hsa-miR-200a-3p
Diseases (MNDR)	chronic myeloid leukemia	over-represented	1.61e-05	4.72e-05	4.72e-05	0.383621	5	hsa-miR-30a-5p; hsa-miR-182-5p; hsa-miR-200b-3p; hsa-miR-183-5p; hsa-miR-200a-3p
Diseases (MNDR)	Cardiomegaly	over-represented	1.7e-05	4.93e-05	4.93e-05	0.387931	5	hsa-miR-30a-5p; hsa-miR-148a-3p; hsa-miR-182-5p; hsa-miR-200b-3p; hsa-miR-200a-3p
Diseases (MNDR)	Lupus Vulgaris	over-represented	1.7e-05	4.93e-05	4.93e-05	0.387931	5	hsa-miR-30a-5p; hsa-miR-148a-3p; hsa-miR-182-5p; hsa-miR-200b-3p; hsa-miR-200a-3p
Diseases (MNDR)	lung squamous cell carcinoma	over-represented	1.75e-05	5.04e-05	5.04e-05	2.36638	9	hsa-miR-30a-5p; hsa-miR-148a-3p; hsa-miR-381-3p; hsa-miR-182-5p; hsa-miR-200b-3p; hsa-miR-183-5p; hsa-miR-363-3p; hsa-miR-200a-3p; hsa-miR-134-5p
Diseases (MNDR)	Carcinoma, Renal Cell	over-represented	1.78e-05	5.11e-05	5.11e-05	1.65948	8	hsa-miR-30a-5p; hsa-miR-381-3p; hsa-miR-182-5p; hsa-miR-200b-3p; hsa-miR-183-5p; hsa-miR-363-3p; hsa-miR-200a-3p; hsa-miR-134-5p
Diseases (MNDR)	Stroke, Lacunar	over-represented	1.98e-05	5.65e-05	5.65e-05	1.13362	7	hsa-miR-30a-5p; hsa-miR-1246; hsa-miR-148a-3p; hsa-miR-381-3p; hsa-miR-182-5p; hsa-miR-183-5p; hsa-miR-363-3p
Diseases (MNDR)	heart disease	over-represented	2.39e-05	6.78e-05	6.78e-05	1.72414	8	hsa-miR-30a-5p; hsa-miR-148a-3p; hsa-miR-182-5p; hsa-miR-200b-3p; hsa-miR-183-5p; hsa-miR-363-3p; hsa-miR-200a-3p; hsa-miR-134-5p
Diseases (MNDR)	asthma	over-represented	2.59e-05	7.3e-05	7.3e-05	0.422414	5	hsa-miR-30a-5p; hsa-miR-148a-3p; hsa-miR-182-5p; hsa-miR-200b-3p; hsa-miR-200a-3p
Diseases (MNDR)	melanoma	over-represented	2.62e-05	7.36e-05	7.36e-05	2.47845	9	hsa-miR-30a-5p; hsa-miR-148a-3p; hsa-miR-381-3p; hsa-miR-182-5p; hsa-miR-200b-3p; hsa-miR-183-5p; hsa-miR-363-3p; hsa-miR-200a-3p; hsa-miR-134-5p
Diseases (MNDR)	Nevus, Pigmented	over-represented	3.1e-05	8.63e-05	8.63e-05	0.206897	4	hsa-miR-148a-3p; hsa-miR-182-5p; hsa-miR-200b-3p; hsa-miR-134-5p
Diseases (MNDR)	bladder urothelial carcinoma	over-represented	3.12e-05	8.65e-05	8.65e-05	1.78448	8	hsa-miR-30a-5p; hsa-miR-148a-3p; hsa-miR-381-3p; hsa-miR-182-5p; hsa-miR-200b-3p; hsa-miR-183-5p; hsa-miR-200a-3p; hsa-miR-134-5p
Diseases (MNDR)	mesenchymal cell neoplasm	over-represented	3.14e-05	8.66e-05	8.66e-05	0.0689655	3	hsa-miR-182-5p; hsa-miR-200b-3p; hsa-miR-200a-3p
Diseases (MNDR)	relapsing-remitting multiple sclerosis	over-represented	3.23e-05	8.87e-05	8.87e-05	1.7931	8	hsa-miR-30a-5p; hsa-miR-1246; hsa-miR-148a-3p; hsa-miR-182-5p; hsa-miR-200b-3p; hsa-miR-363-3p; hsa-miR-200a-3p; hsa-miR-134-5p
Diseases (MNDR)	Her2-receptor positive breast cancer	over-represented	3.34e-05	9.11e-05	9.11e-05	2.54741	9	hsa-miR-30a-5p; hsa-miR-1246; hsa-miR-381-3p; hsa-miR-182-5p; hsa-miR-200b-3p; hsa-miR-183-5p; hsa-miR-363-3p; hsa-miR-200a-3p; hsa-miR-134-5p
Diseases (MNDR)	Aging	over-represented	4.27e-05	9.84e-05	9.84e-05	0.224138	4	hsa-miR-148a-3p; hsa-miR-182-5p; hsa-miR-200b-3p; hsa-miR-200a-3p
Diseases (MNDR)	Arrhythmias, Cardiac	over-represented	3.95e-05	9.84e-05	9.84e-05	0.219828	4	hsa-miR-148a-3p; hsa-miR-182-5p; hsa-miR-200b-3p; hsa-miR-134-5p
Diseases (MNDR)	Brain Ischemia	over-represented	3.95e-05	9.84e-05	9.84e-05	0.219828	4	hsa-miR-148a-3p; hsa-miR-182-5p; hsa-miR-200b-3p; hsa-miR-134-5p
Diseases (MNDR)	Carcinoma, Ductal, Breast	over-represented	4.1e-05	9.84e-05	9.84e-05	1.84914	8	hsa-miR-30a-5p; hsa-miR-148a-3p; hsa-miR-381-3p; hsa-miR-182-5p; hsa-miR-200b-3p; hsa-miR-183-5p; hsa-miR-200a-3p; hsa-miR-134-5p
Diseases (MNDR)	Cerebellar Neoplasms	over-represented	4.27e-05	9.84e-05	9.84e-05	0.224138	4	hsa-miR-148a-3p; hsa-miR-182-5p; hsa-miR-200b-3p; hsa-miR-134-5p
Diseases (MNDR)	Cervical Intraepithelial Neoplasia	over-represented	3.95e-05	9.84e-05	9.84e-05	0.219828	4	hsa-miR-148a-3p; hsa-miR-182-5p; hsa-miR-200b-3p; hsa-miR-134-5p
Diseases (MNDR)	Child Development Disorders, Pervasive	over-represented	3.65e-05	9.84e-05	9.84e-05	0.215517	4	hsa-miR-30a-5p; hsa-miR-148a-3p; hsa-miR-182-5p; hsa-miR-200b-3p
Diseases (MNDR)	Digestive System Neoplasms	over-represented	3.65e-05	9.84e-05	9.84e-05	0.215517	4	hsa-miR-148a-3p; hsa-miR-182-5p; hsa-miR-200b-3p; hsa-miR-200a-3p
Diseases (MNDR)	HEV	over-represented	4.27e-05	9.84e-05	9.84e-05	0.224138	4	hsa-miR-148a-3p; hsa-miR-182-5p; hsa-miR-200b-3p; hsa-miR-134-5p
Diseases (MNDR)	HIV-1	over-represented	3.95e-05	9.84e-05	9.84e-05	0.219828	4	hsa-miR-148a-3p; hsa-miR-182-5p; hsa-miR-200b-3p; hsa-miR-183-5p
Diseases (MNDR)	Hailey-Hailey disease	over-represented	3.95e-05	9.84e-05	9.84e-05	0.219828	4	hsa-miR-148a-3p; hsa-miR-182-5p; hsa-miR-200b-3p; hsa-miR-134-5p
Diseases (MNDR)	Leukemia, Biphenotypic, Acute	over-represented	4.27e-05	9.84e-05	9.84e-05	0.224138	4	hsa-miR-148a-3p; hsa-miR-182-5p; hsa-miR-200b-3p; hsa-miR-183-5p
Diseases (MNDR)	Leukemia, Myeloid, Chronic-Phase	over-represented	4.27e-05	9.84e-05	9.84e-05	0.224138	4	hsa-miR-30a-5p; hsa-miR-148a-3p; hsa-miR-182-5p; hsa-miR-200b-3p
Diseases (MNDR)	Leukoplakia, Oral	over-represented	4.27e-05	9.84e-05	9.84e-05	0.224138	4	hsa-miR-148a-3p; hsa-miR-182-5p; hsa-miR-200b-3p; hsa-miR-134-5p
Diseases (MNDR)	Lichen Planus, Oral	over-represented	4.27e-05	9.84e-05	9.84e-05	0.224138	4	hsa-miR-148a-3p; hsa-miR-182-5p; hsa-miR-200b-3p; hsa-miR-200a-3p
Diseases (MNDR)	Lymphoma, Extranodal NK-T-Cell	over-represented	4.27e-05	9.84e-05	9.84e-05	0.224138	4	hsa-miR-148a-3p; hsa-miR-182-5p; hsa-miR-200b-3p; hsa-miR-134-5p
Diseases (MNDR)	Lymphoproliferative Disorders	over-represented	4.27e-05	9.84e-05	9.84e-05	0.224138	4	hsa-miR-148a-3p; hsa-miR-182-5p; hsa-miR-200b-3p; hsa-miR-134-5p
Diseases (MNDR)	Marek Disease	over-represented	3.95e-05	9.84e-05	9.84e-05	0.219828	4	hsa-miR-148a-3p; hsa-miR-182-5p; hsa-miR-200b-3p; hsa-miR-200a-3p
Diseases (MNDR)	Nasal Polyps	over-represented	3.95e-05	9.84e-05	9.84e-05	0.219828	4	hsa-miR-148a-3p; hsa-miR-182-5p; hsa-miR-200b-3p; hsa-miR-134-5p
Diseases (MNDR)	Sezarys disease	over-represented	4.27e-05	9.84e-05	9.84e-05	0.224138	4	hsa-miR-148a-3p; hsa-miR-182-5p; hsa-miR-200b-3p; hsa-miR-200a-3p
Diseases (MNDR)	T-cell leukemia	over-represented	4.17e-05	9.84e-05	9.84e-05	0.465517	5	hsa-miR-30a-5p; hsa-miR-148a-3p; hsa-miR-182-5p; hsa-miR-200a-3p; hsa-miR-134-5p
Diseases (MNDR)	Vascular Calcification	over-represented	4.27e-05	9.84e-05	9.84e-05	0.224138	4	hsa-miR-30a-5p; hsa-miR-148a-3p; hsa-miR-200b-3p; hsa-miR-134-5p
Diseases (MNDR)	anus neoplasm	over-represented	4.27e-05	9.84e-05	9.84e-05	0.224138	4	hsa-miR-148a-3p; hsa-miR-182-5p; hsa-miR-200b-3p; hsa-miR-134-5p
Diseases (MNDR)	dementia	over-represented	3.95e-05	9.84e-05	9.84e-05	0.219828	4	hsa-miR-148a-3p; hsa-miR-182-5p; hsa-miR-200b-3p; hsa-miR-134-5p
Diseases (MNDR)	endomyocardial fibrosis	over-represented	3.95e-05	9.84e-05	9.84e-05	0.219828	4	hsa-miR-30a-5p; hsa-miR-148a-3p; hsa-miR-200b-3p; hsa-miR-200a-3p
Diseases (MNDR)	gastric lymphoma	over-represented	3.81e-05	9.84e-05	9.84e-05	0.456897	5	hsa-miR-30a-5p; hsa-miR-182-5p; hsa-miR-200b-3p; hsa-miR-200a-3p; hsa-miR-134-5p
Diseases (MNDR)	germ cell and embryonal cancer	over-represented	4.27e-05	9.84e-05	9.84e-05	0.224138	4	hsa-miR-148a-3p; hsa-miR-182-5p; hsa-miR-200b-3p; hsa-miR-134-5p
Diseases (MNDR)	hepatocellular carcinoma	over-represented	4.12e-05	9.84e-05	9.84e-05	3.65517	10	hsa-miR-30a-5p; hsa-miR-1246; hsa-miR-148a-3p; hsa-miR-381-3p; hsa-miR-182-5p; hsa-miR-200b-3p; hsa-miR-183-5p; hsa-miR-363-3p; hsa-miR-200a-3p; hsa-miR-134-5p
Diseases (MNDR)	leiomyosarcoma	over-represented	4.27e-05	9.84e-05	9.84e-05	0.224138	4	hsa-miR-148a-3p; hsa-miR-182-5p; hsa-miR-200b-3p; hsa-miR-134-5p
Diseases (MNDR)	male infertility	over-represented	4.27e-05	9.84e-05	9.84e-05	0.224138	4	hsa-miR-148a-3p; hsa-miR-182-5p; hsa-miR-200b-3p; hsa-miR-200a-3p
Diseases (MNDR)	mycosis fungoides	over-represented	4.27e-05	9.84e-05	9.84e-05	0.224138	4	hsa-miR-148a-3p; hsa-miR-182-5p; hsa-miR-200b-3p; hsa-miR-200a-3p
Diseases (MNDR)	myositis ossificans	over-represented	4.27e-05	9.84e-05	9.84e-05	0.224138	4	hsa-miR-148a-3p; hsa-miR-182-5p; hsa-miR-200b-3p; hsa-miR-134-5p
Diseases (MNDR)	panic disorder	over-represented	3.95e-05	9.84e-05	9.84e-05	0.219828	4	hsa-miR-148a-3p; hsa-miR-182-5p; hsa-miR-200b-3p; hsa-miR-183-5p
Diseases (MNDR)	peripheral nerve sheath neoplasm	over-represented	4.27e-05	9.84e-05	9.84e-05	0.224138	4	hsa-miR-148a-3p; hsa-miR-182-5p; hsa-miR-200b-3p; hsa-miR-134-5p
Diseases (MNDR)	Esophagus	over-represented	4.61e-05	0.000102	0.000102	0.228448	4	hsa-miR-148a-3p; hsa-miR-182-5p; hsa-miR-200b-3p; hsa-miR-134-5p
Diseases (MNDR)	Heart Defects, Congenital	over-represented	4.61e-05	0.000102	0.000102	0.228448	4	hsa-miR-30a-5p; hsa-miR-148a-3p; hsa-miR-182-5p; hsa-miR-200b-3p
Diseases (MNDR)	Hypertrophy, Left Ventricular	over-represented	4.61e-05	0.000102	0.000102	0.228448	4	hsa-miR-30a-5p; hsa-miR-148a-3p; hsa-miR-182-5p; hsa-miR-200b-3p
Target genes (miRTarBase)	DNMT1	over-represented	8.12e-06	0.0141146	0.0141146	0.148322	4	hsa-miR-30a-5p; hsa-miR-148a-3p; hsa-miR-200b-3p; hsa-miR-200a-3p
Target genes (miRTarBase)	PCDH8	over-represented	1.37e-05	0.0141146	0.0141146	0.0078064	2	hsa-miR-182-5p; hsa-miR-200a-3p
Target genes (miRTarBase)	SEPT7	over-represented	2.34e-05	0.0160328	0.0160328	0.0624512	3	hsa-miR-30a-5p; hsa-miR-200b-3p; hsa-miR-200a-3p
Target genes (miRTarBase)	RBM34	over-represented	4.11e-05	0.0194223	0.0194223	0.0117096	2	hsa-miR-30a-5p; hsa-miR-183-5p
Target genes (miRTarBase)	VAC14	over-represented	4.72e-05	0.0194223	0.0194223	0.078064	3	hsa-miR-381-3p; hsa-miR-200b-3p; hsa-miR-200a-3p
Target genes (miRTarBase)	ATF1	over-represented	0.000136	0.0203122	0.0203122	0.019516	2	hsa-miR-30a-5p; hsa-miR-182-5p
Target genes (miRTarBase)	EIF4EBP2	over-represented	0.000138	0.0203122	0.0203122	0.300546	4	hsa-miR-182-5p; hsa-miR-183-5p; hsa-miR-363-3p; hsa-miR-134-5p
Target genes (miRTarBase)	LOX	over-represented	8.31e-05	0.0203122	0.0203122	0.0936768	3	hsa-miR-30a-5p; hsa-miR-182-5p; hsa-miR-200b-3p
Target genes (miRTarBase)	REV3L	over-represented	0.000133	0.0203122	0.0203122	0.10929	3	hsa-miR-30a-5p; hsa-miR-183-5p; hsa-miR-363-3p
Target genes (miRTarBase)	RIN2	over-represented	0.000136	0.0203122	0.0203122	0.019516	2	hsa-miR-200b-3p; hsa-miR-200a-3p
Target genes (miRTarBase)	SMAD2	over-represented	0.000138	0.0203122	0.0203122	0.300546	4	hsa-miR-148a-3p; hsa-miR-381-3p; hsa-miR-200b-3p; hsa-miR-200a-3p
Target genes (miRTarBase)	TCF7L1	over-represented	0.000136	0.0203122	0.0203122	0.019516	2	hsa-miR-200b-3p; hsa-miR-200a-3p
Target genes (miRTarBase)	UBP1	over-represented	8.2e-05	0.0203122	0.0203122	0.0156128	2	hsa-miR-182-5p; hsa-miR-183-5p
Target genes (miRTarBase)	ZNF621	over-represented	0.000131	0.0203122	0.0203122	0.296643	4	hsa-miR-200b-3p; hsa-miR-183-5p; hsa-miR-200a-3p; hsa-miR-134-5p
Target genes (miRTarBase)	GID4	over-represented	0.000169	0.021684	0.021684	0.316159	4	hsa-miR-381-3p; hsa-miR-182-5p; hsa-miR-183-5p; hsa-miR-363-3p
Target genes (miRTarBase)	PTPRD	over-represented	0.000165	0.021684	0.021684	0.117096	3	hsa-miR-1246; hsa-miR-200b-3p; hsa-miR-200a-3p
Target genes (miRTarBase)	KLF11	over-represented	0.000285	0.0325924	0.0325924	0.0273224	2	hsa-miR-200b-3p; hsa-miR-200a-3p
Target genes (miRTarBase)	ZFPM2	over-represented	0.000285	0.0325924	0.0325924	0.0273224	2	hsa-miR-200b-3p; hsa-miR-200a-3p
Target genes (miRTarBase)	CCNE2	over-represented	0.000423	0.0389386	0.0389386	0.160031	3	hsa-miR-30a-5p; hsa-miR-200b-3p; hsa-miR-200a-3p
Target genes (miRTarBase)	CREB1	over-represented	0.000446	0.0389386	0.0389386	0.405933	4	hsa-miR-381-3p; hsa-miR-182-5p; hsa-miR-200b-3p; hsa-miR-363-3p
Target genes (miRTarBase)	ELMO2	over-represented	0.000379	0.0389386	0.0389386	0.0312256	2	hsa-miR-200b-3p; hsa-miR-200a-3p
Target genes (miRTarBase)	ERBIN	over-represented	0.000454	0.0389386	0.0389386	0.163934	3	hsa-miR-200b-3p; hsa-miR-183-5p; hsa-miR-200a-3p
Target genes (miRTarBase)	RND3	over-represented	0.000379	0.0389386	0.0389386	0.0312256	2	hsa-miR-30a-5p; hsa-miR-200b-3p
Target genes (miRTarBase)	UHRF1BP1	over-represented	0.000423	0.0389386	0.0389386	0.160031	3	hsa-miR-30a-5p; hsa-miR-200b-3p; hsa-miR-363-3p
Target genes (miRTarBase)	ZEB1	over-represented	0.000487	0.0401016	0.0401016	0.167838	3	hsa-miR-200b-3p; hsa-miR-183-5p; hsa-miR-200a-3p
Target genes (miRTarBase)	NOTCH1	over-represented	0.000522	0.0412952	0.0412952	0.171741	3	hsa-miR-30a-5p; hsa-miR-200b-3p; hsa-miR-363-3p
Target genes (miRTarBase)	IKBKB	over-represented	0.000607	0.0430791	0.0430791	0.039032	2	hsa-miR-148a-3p; hsa-miR-200b-3p
Target genes (miRTarBase)	SHC1	over-represented	0.000607	0.0430791	0.0430791	0.039032	2	hsa-miR-200b-3p; hsa-miR-200a-3p
Target genes (miRTarBase)	USP16	over-represented	0.000607	0.0430791	0.0430791	0.039032	2	hsa-miR-30a-5p; hsa-miR-182-5p
Target genes (miRTarBase)	MALT1	over-represented	0.000763	0.0490419	0.0490419	0.19516	3	hsa-miR-182-5p; hsa-miR-200b-3p; hsa-miR-200a-3p
Target genes (miRTarBase)	PHF14	over-represented	0.00074	0.0490419	0.0490419	0.0429352	2	hsa-miR-200b-3p; hsa-miR-183-5p
Target genes (miRTarBase)	WNT1	over-represented	0.00074	0.0490419	0.0490419	0.0429352	2	hsa-miR-148a-3p; hsa-miR-200b-3p

## Sheet: miRNet miRNA-gene network
miRnet output. The table depicts the node table of the miRNA-target-gene network built up from the list of 10 upregulated miRNAs during T. cruzi infection of cardiomyocytes.
Id	Label	Degree	Betweenness
hsa-mir-30a-5p	hsa-mir-30a-5p	24	417.654
hsa-mir-200b-3p	hsa-mir-200b-3p	15	154.934
hsa-mir-182-5p	hsa-mir-182-5p	13	134.903
hsa-mir-183-5p	hsa-mir-183-5p	11	91.6281
hsa-mir-148a-3p	hsa-mir-148a-3p	10	89.9117
hsa-mir-363-3p	hsa-mir-363-3p	10	64.9124
hsa-mir-200a-3p	hsa-mir-200a-3p	9	63.3135
hsa-mir-381-3p	hsa-mir-381-3p	9	86.3234
hsa-mir-134-5p	hsa-mir-134-5p	7	57.674
hsa-mir-1246	hsa-mir-1246	7	49.7452
NUFIP2	NUFIP2	5	31.4528
DNMT1	DNMT1	4	24.5615
PLAGL2	PLAGL2	4	39.0674
CELF1	CELF1	4	20.0548
SMAD2	SMAD2	4	27.471
CREB1	CREB1	4	22.3553
GID4	GID4	4	22.3473
ZNF621	ZNF621	4	23.1637
ZFP36L1	ZFP36L1	3	11.3953
SEPT7	SEPT7	3	10.2877
FOXN2	FOXN2	3	10.0486
LDLR	LDLR	3	16.4091
LOX	LOX	3	11.2452
NOTCH1	NOTCH1	3	9.88688
ZNF264	ZNF264	3	13.5233
BAG4	BAG4	3	9.54087
LHFPL2	LHFPL2	3	18.4934
SEC24A	SEC24A	3	14.6027
CBX3	CBX3	3	18.2773
TNRC6A	TNRC6A	3	14.421
TMED7	TMED7	3	12.3898
CDKN1A	CDKN1A	3	11.8414
TXNIP	TXNIP	3	11.5414
GSK3B	GSK3B	3	11.7639
UQCRFS1	UQCRFS1	3	9.60821
TP53INP1	TP53INP1	3	14.1408
SHOX2	SHOX2	3	10.4908
PTPRD	PTPRD	3	11.42
ACTC1	ACTC1	2	3.2652
APLP2	APLP2	2	4.59679
RND3	RND3	2	3.26472
ATF1	ATF1	2	4.82205
ATRX	ATRX	2	5.3189
DSG2	DSG2	2	6.70089
MPP2	MPP2	2	7.3924
AKAP17A	AKAP17A	2	3.55496
PCDH8	PCDH8	2	3.38563
POLA2	POLA2	2	5.5486
RORA	RORA	2	5.34843

## Sheet: Reactome pathway enrichment of 
miRNet ORA of REACTOME pathways on the list of genes included in the miRNA-gene network. For the top 30 pathways, genes contributing to the significant enrichment are shown (1 indicates that the gene contributes to the enrichment)
Pathway	Total	Expected	Hits	Pval	FDR	CREB1	CDKN1A	GSK3B	TNRC6A	ATF1	NOTCH1
Constitutive Signaling by AKT1 E17K in Cancer	22	0.0619	3	2.82e-05	0.00125	1	1	1	0	0	0
PI3K events in ERBB4 signaling	94	0.265	4	0.000117	0.00125	1	1	1	1	0	0
PIP3 activates AKT signaling	94	0.265	4	0.000117	0.00125	1	1	1	1	0	0
PI3K events in ERBB2 signaling	94	0.265	4	0.000117	0.00125	1	1	1	1	0	0
PI-3K cascade:FGFR1	94	0.265	4	0.000117	0.00125	1	1	1	1	0	0
PI-3K cascade:FGFR2	94	0.265	4	0.000117	0.00125	1	1	1	1	0	0
PI-3K cascade:FGFR3	94	0.265	4	0.000117	0.00125	1	1	1	1	0	0
PI-3K cascade:FGFR4	94	0.265	4	0.000117	0.00125	1	1	1	1	0	0
PI3K/AKT activation	97	0.273	4	0.000132	0.00125	1	1	1	1	0	0
GAB1 signalosome	98	0.276	4	0.000137	0.00125	1	1	1	1	0	0
NGF signalling via TRKA from the plasma membrane	189	0.532	5	0.000138	0.00125	1	1	1	1	1	0
CREB phosphorylation	7	0.0197	2	0.000156	0.00128	1	0	0	0	1	0
Role of LAT2/NTAL/LAB on calcium mobilization	103	0.29	4	0.000166	0.00128	1	1	1	1	0	0
Diseases of signal transduction	235	0.662	5	0.000382	0.00258	1	1	1	0	1	1
AKT phosphorylates targets in the cytosol	11	0.031	2	0.000407	0.00258	0	1	1	0	0	0
Signaling by SCF-KIT	133	0.374	4	0.000444	0.00258	1	1	1	1	0	0
Downstream signaling of activated FGFR1	139	0.391	4	0.000525	0.00258	1	1	1	1	0	0
Downstream signaling of activated FGFR2	139	0.391	4	0.000525	0.00258	1	1	1	1	0	0
Downstream signaling of activated FGFR3	139	0.391	4	0.000525	0.00258	1	1	1	1	0	0
Downstream signaling of activated FGFR4	139	0.391	4	0.000525	0.00258	1	1	1	1	0	0
Signaling by ERBB4	143	0.403	4	0.000585	0.00258	1	1	1	1	0	0
Downstream signal transduction	151	0.425	4	0.000718	0.00258	1	1	1	1	0	0
Signaling by FGFR	151	0.425	4	0.000718	0.00258	1	1	1	1	0	0
Signaling by FGFR1	151	0.425	4	0.000718	0.00258	1	1	1	1	0	0
Signaling by FGFR2	151	0.425	4	0.000718	0.00258	1	1	1	1	0	0
Signaling by FGFR3	151	0.425	4	0.000718	0.00258	1	1	1	1	0	0
Signaling by FGFR4	151	0.425	4	0.000718	0.00258	1	1	1	1	0	0
Signaling by ERBB2	152	0.428	4	0.000736	0.00258	1	1	1	1	0	0
Signalling by NGF	273	0.769	5	0.000761	0.00258	1	1	1	1	1	0
DAP12 signaling	154	0.434	4	0.000773	0.00258	1	1	1	1	0	0
Downstream signaling events of B Cell Receptor (BCR)	164	0.462	4	0.000979	0.00316
Signaling by EGFR	168	0.473	4	0.00107	0.00333
Fc epsilon receptor (FCERI) signaling	169	0.476	4	0.0011	0.00333
DAP12 interactions	171	0.481	4	0.00114	0.00335
Pre-NOTCH Transcription and Translation	19	0.0535	2	0.00125	0.00357
Signaling by PDGF	177	0.498	4	0.0013	0.00361
Nuclear Events (kinase and transcription factor activation)	20	0.0563	2	0.00138	0.00371
PI3K/AKT Signaling in Cancer	81	0.228	3	0.00141	0.00371
Signaling by NOTCH	86	0.242	3	0.00167	0.00423
Signaling by the B Cell Receptor (BCR)	190	0.535	4	0.00169	0.00423
Pre-NOTCH Expression and Processing	24	0.0676	2	0.002	0.00488
MAPK targets/ Nuclear events mediated by MAP kinases	26	0.0732	2	0.00234	0.00557
Innate Immune System	569	1.6	6	0.00366	0.00851
Cellular responses to stress	256	0.721	4	0.005	0.0114
Adaptive Immune System	430	1.21	5	0.00566	0.0126
MAP kinase activation in TLR cascade	49	0.138	2	0.00816	0.0177
Regulation of HSF1-mediated heat shock response	54	0.152	2	0.00985	0.021
